# Supplementary material for: Whole genome sequencing enables the characterization of BurI, a LuxI homologueof Burkholderia cepaciastrain GG4
Source: PeerJ journal article supplement (doi:10.7717/peerj.1117), 2015-08-06
Supplement: Supplementary_Figure_S2.pdf [file Supplementary_Figure_S2.pdf]

## Supplementary Figure S2

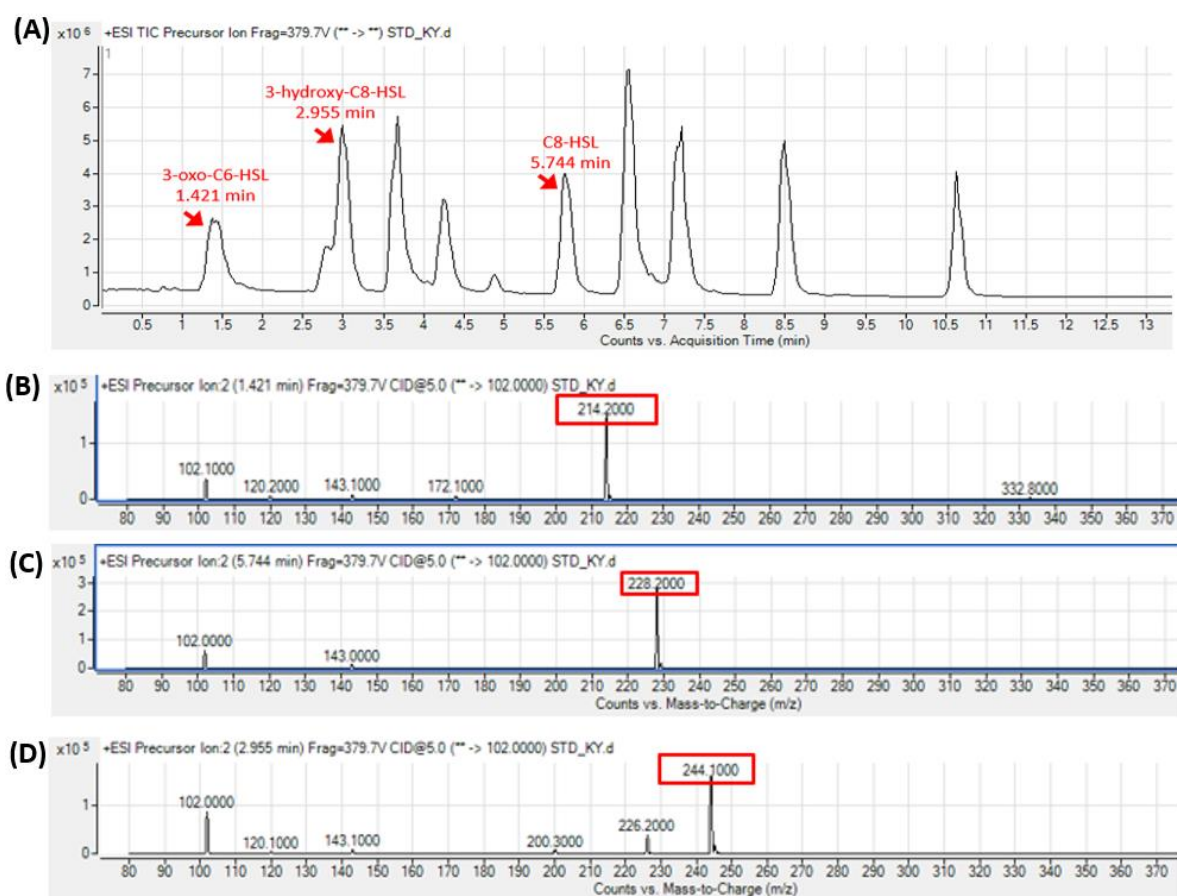

**Figure S2. Chromatogram and mass spectra showing the peaks of the synthetic AHLs (3-oxo-C6-HSL, 3-hydroxy-C8-HSL and C8-HSL, marked by arrows).** (A) Chromatogram of the synthetic standards used in this study. Peaks corresponding to 3-oxo-C6-HSL, 3-hydroxy-C8-HSL and C8-HSL were shown at their respective retention times). (B) mass spectrum of 3-oxo-C6-HSL showing  $m/z$  214.2000. (C) mass spectrum of C8-HSL showing  $m/z$  228.2000. (D) mass spectrum of 3-hydroxy-C8-HSL showing  $m/z$  244.1000.
